# Supplementary material for: A Bayesian Approach to the Evolution of Metabolic Networks on a Phylogeny
Source: PLoS Comput Biol. 2010 Aug 5;6(8):e1000868. doi: 10.1371/journal.pcbi.1000868 (PMC2917375; doi:10.1371/journal.pcbi.1000868)

A Glycolysis / gluconeogenesis

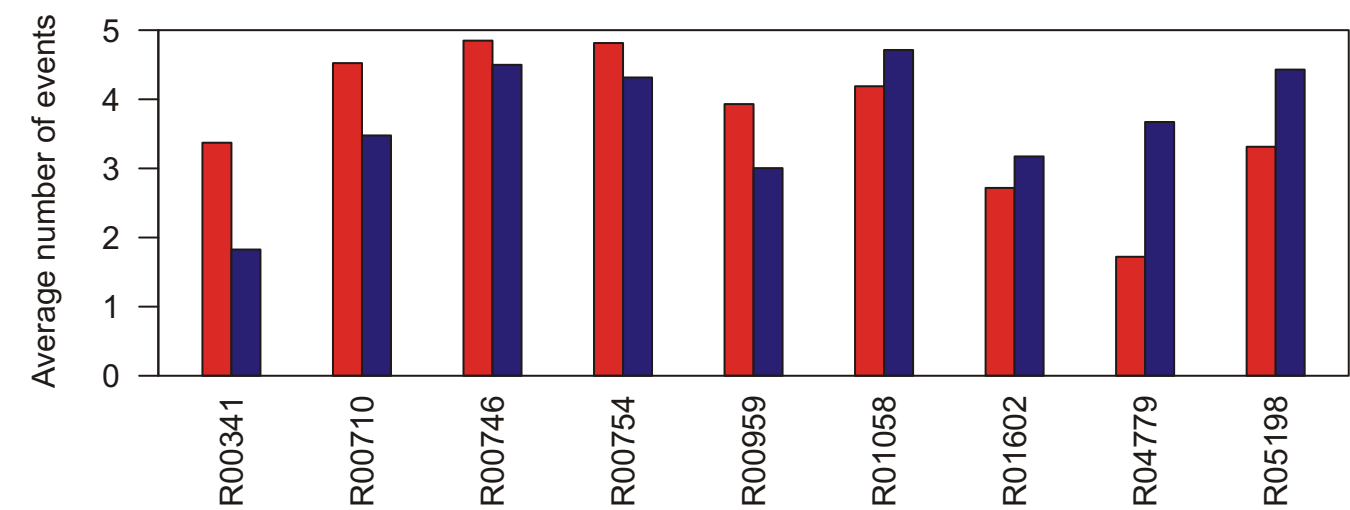

B Pentose phosphate pathway

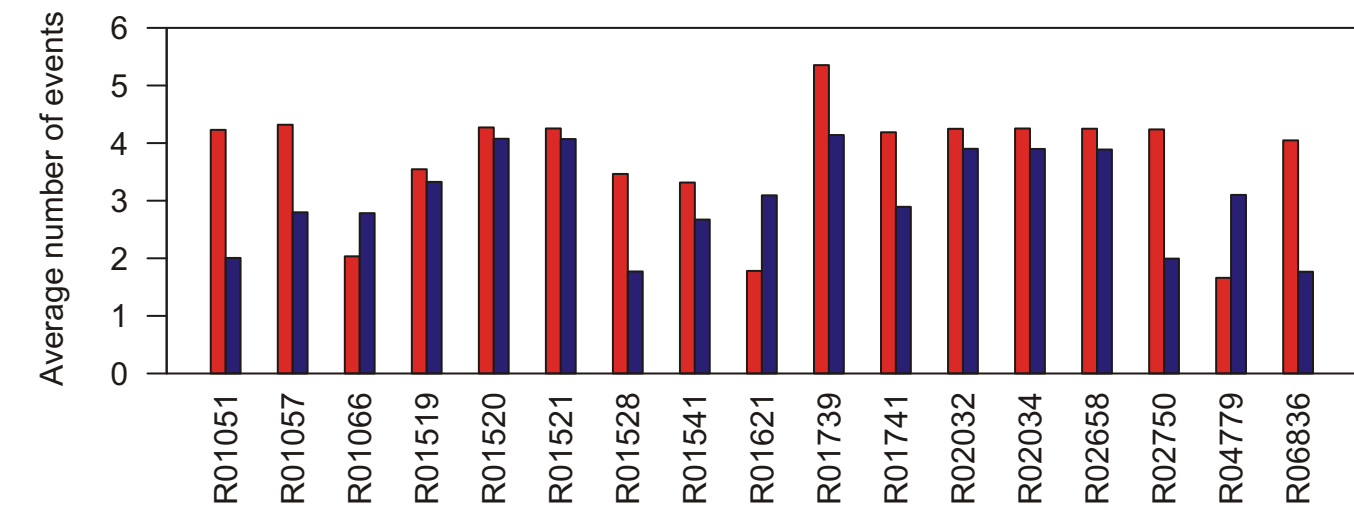

C Lysine degradation

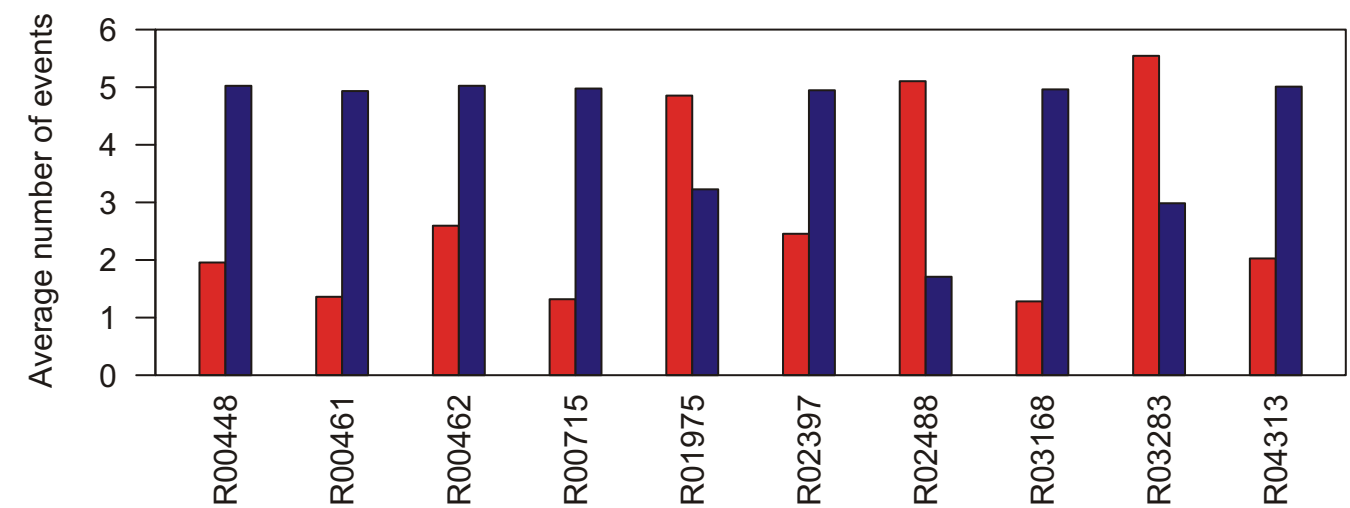

D Histidine metabolism

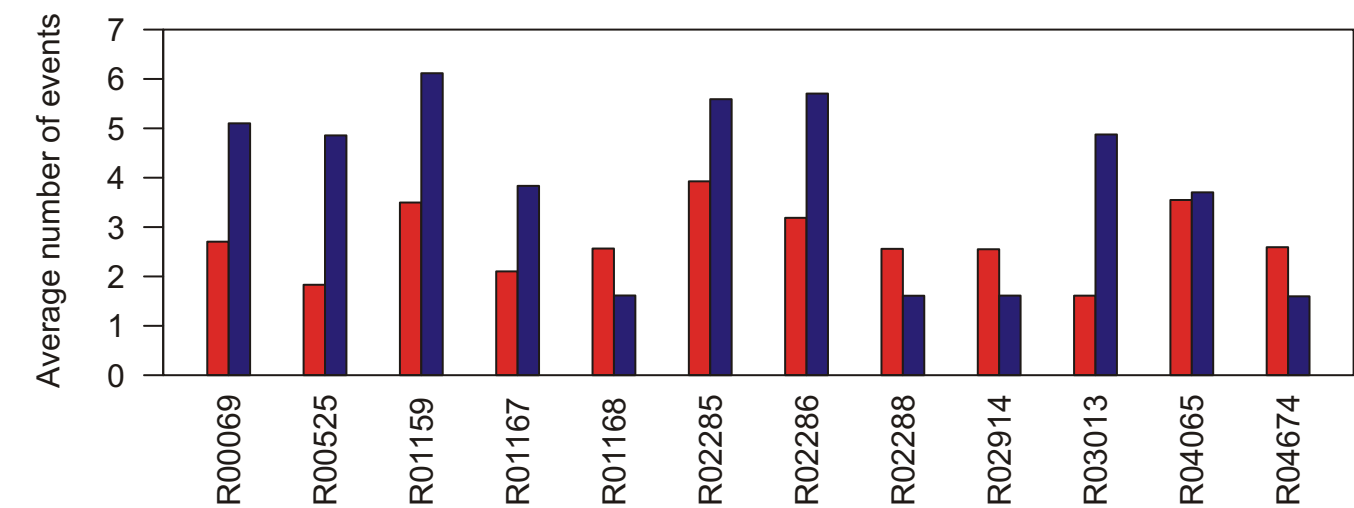

E Phenylalanine metabolism

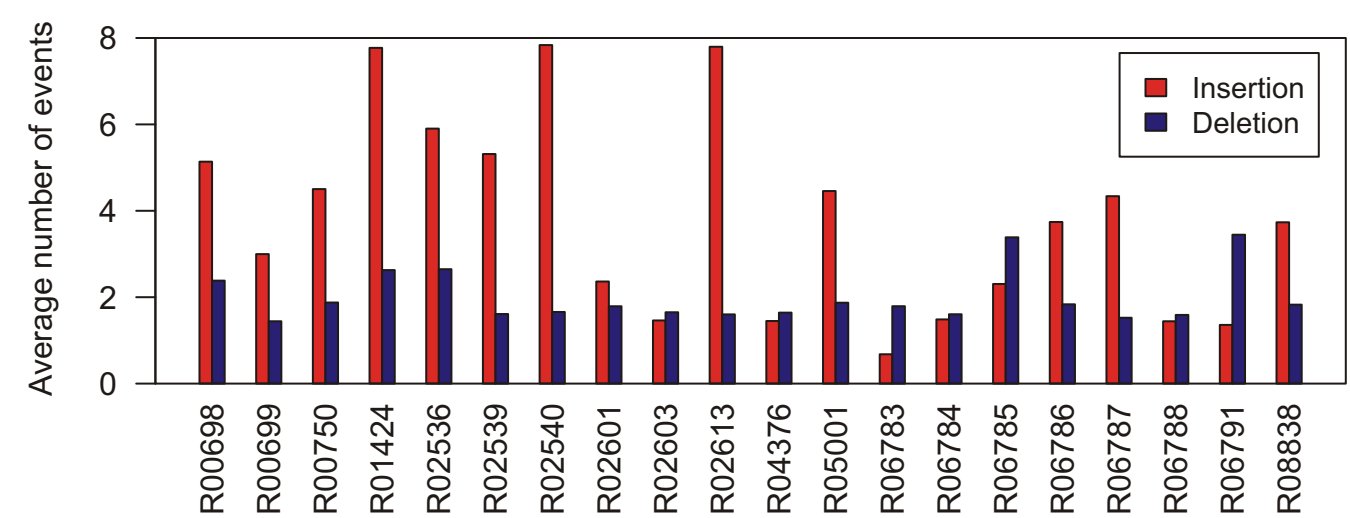

F Pyruvate metabolism

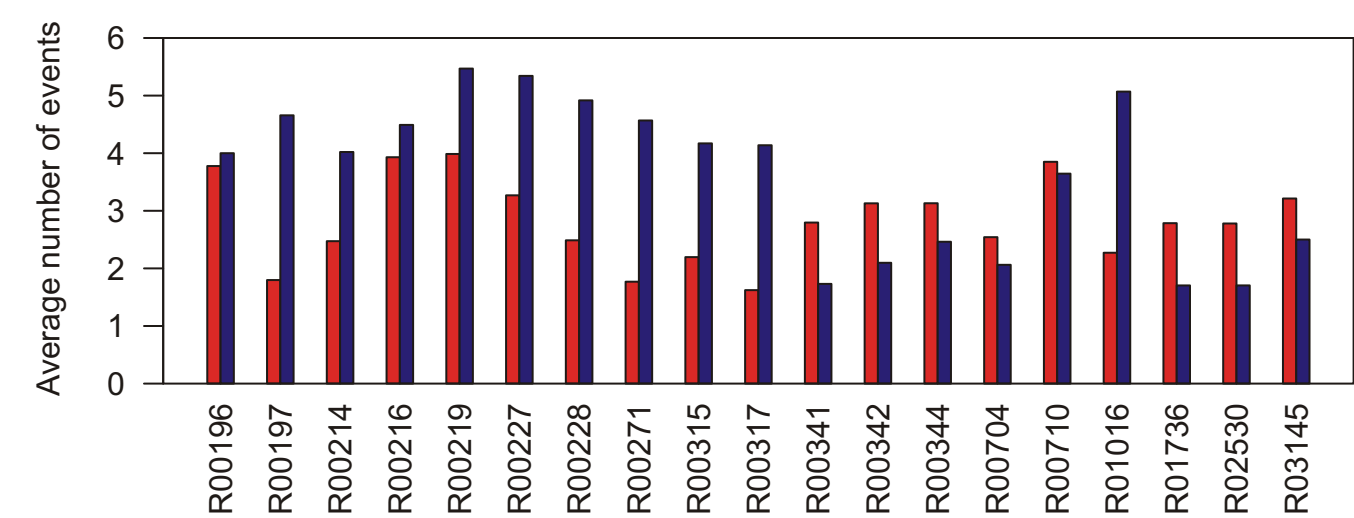

Supplement: Figure S6 — Number of insertion and deletion events for the alterable reactions, that is the reactions which were neither defined as core nor were defined as prohibited in the network obtained using the Gibbs sampler run under the hybrid model. The sampler was run for the six pathway maps used in this analysis over the phylogeny connecting the seventeen Pseudomonas strains shown in Figure 6A for 110,000 iterations with the first 10,000 iterations regarded as burn-in period. Samples were collected every 10th iteration. (0.02 MB PDF) [file pcbi.1000868.s006.pdf]
