# Supplementary material for: A Bayesian Approach to the Evolution of Metabolic Networks on a Phylogeny
Source: PubMed Central journal article supplement (PMC2917375; doi:10.1371/journal.pcbi.1000868), 2010-08-05

# True Likelihood

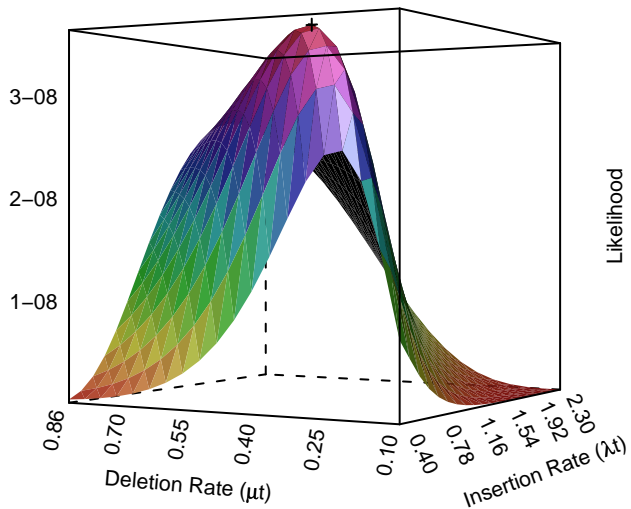

# Estimated Likelihood

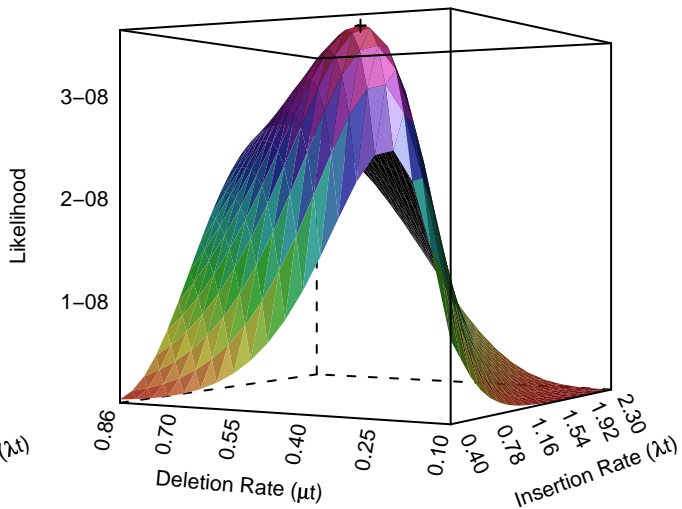

Supplement: pcbi.1000868.s003.pdf [file pcbi.1000868.s003.pdf]
