# Supplementary material for: A Bayesian Approach to the Evolution of Metabolic Networks on a Phylogeny
Source: PubMed Central journal article supplement (PMC2917375; doi:10.1371/journal.pcbi.1000868), 2010-08-05
Supplement: pcbi.1000868.s007.pdf [file pcbi.1000868.s007.pdf]

### A Glycolysis / gluconeogenesis

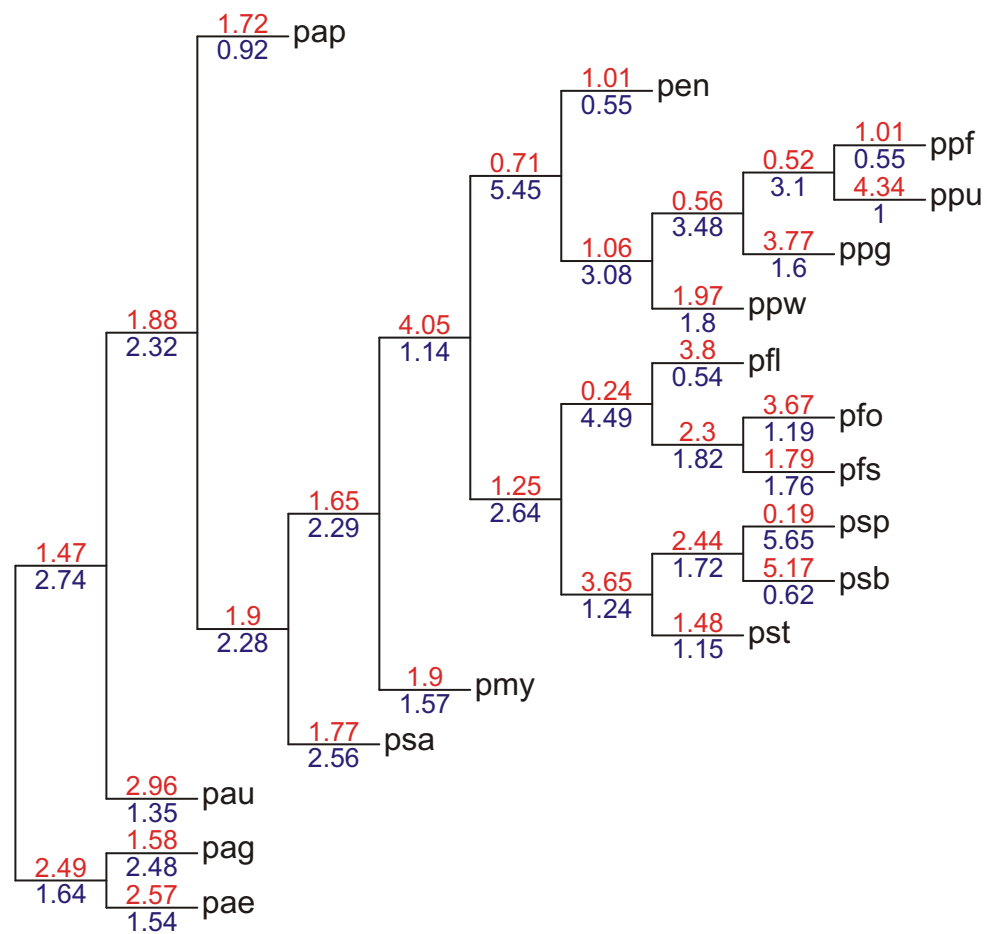

### B Pentose phosphate pathway

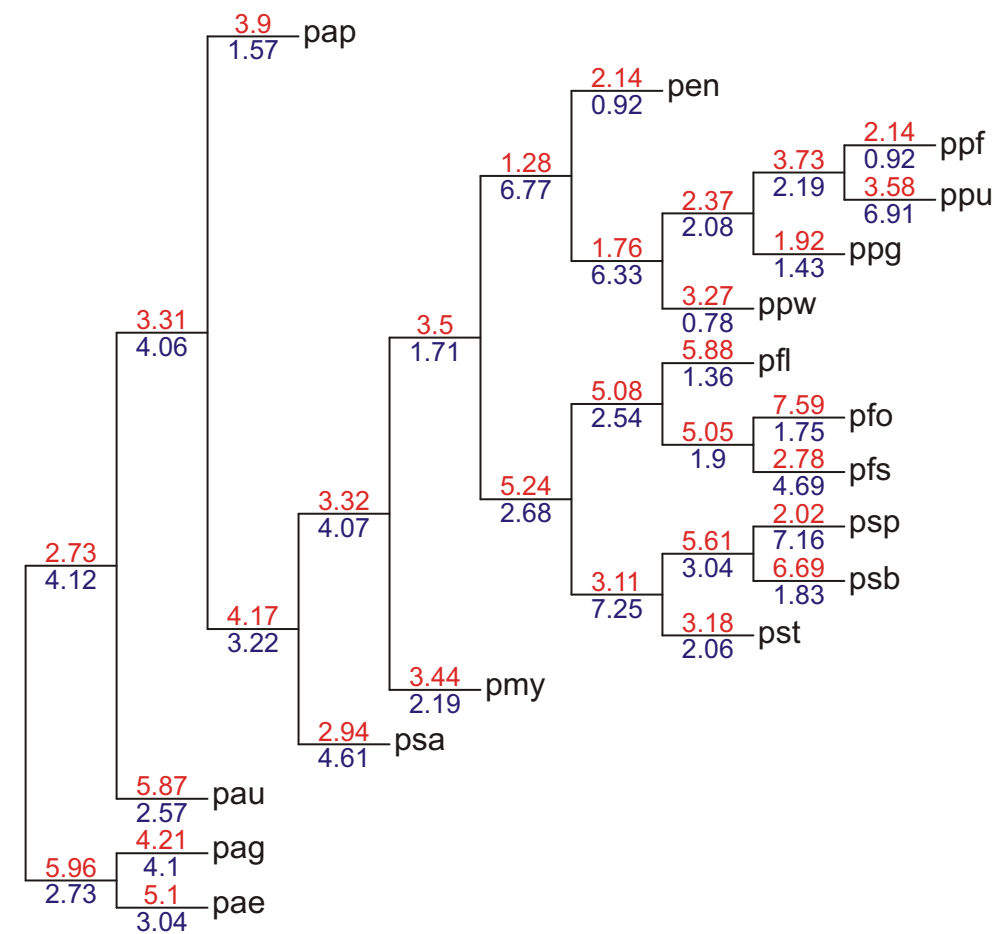

### C Lysine degradation

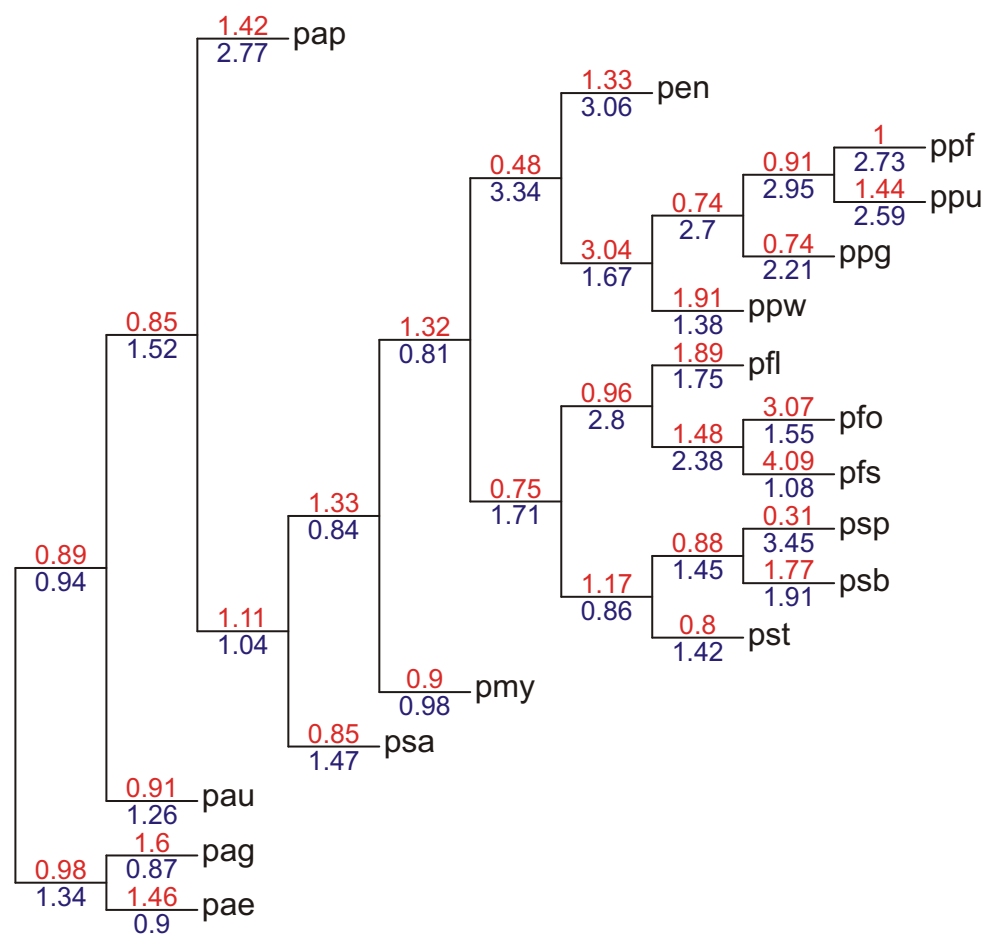

### D Histidine metabolism

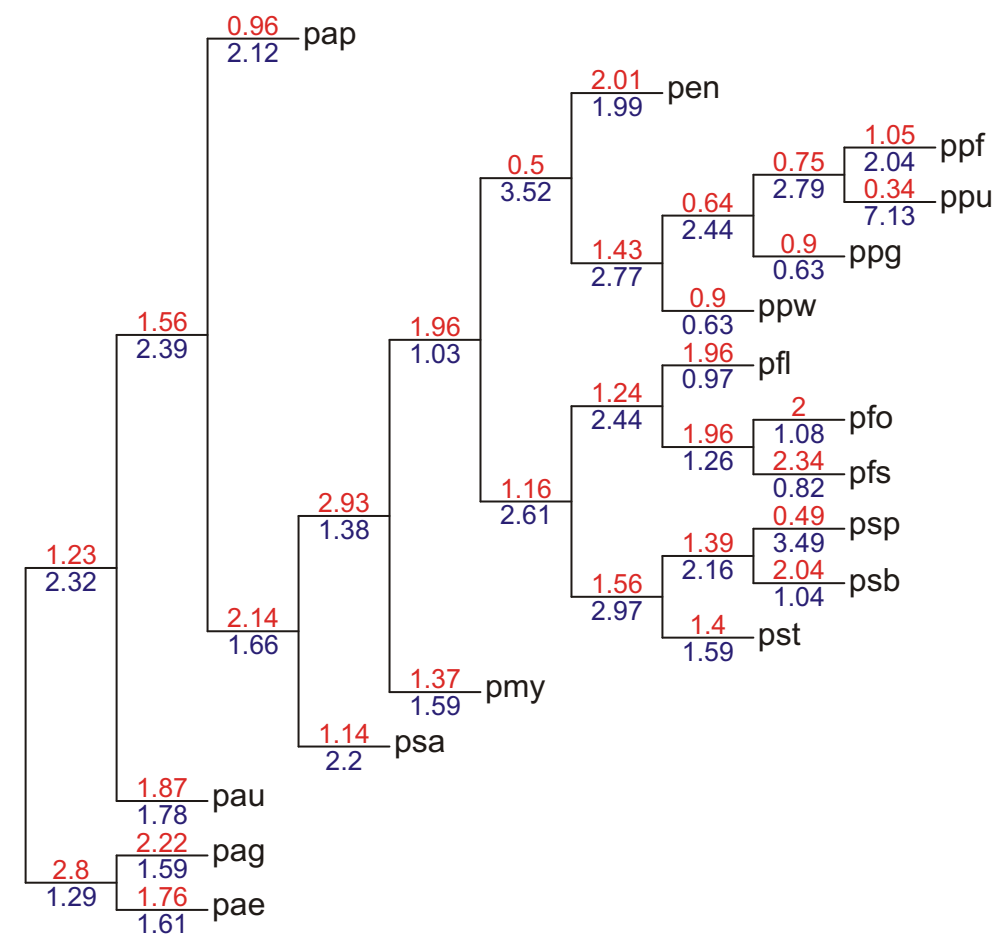

### E Phenylalanine metabolism

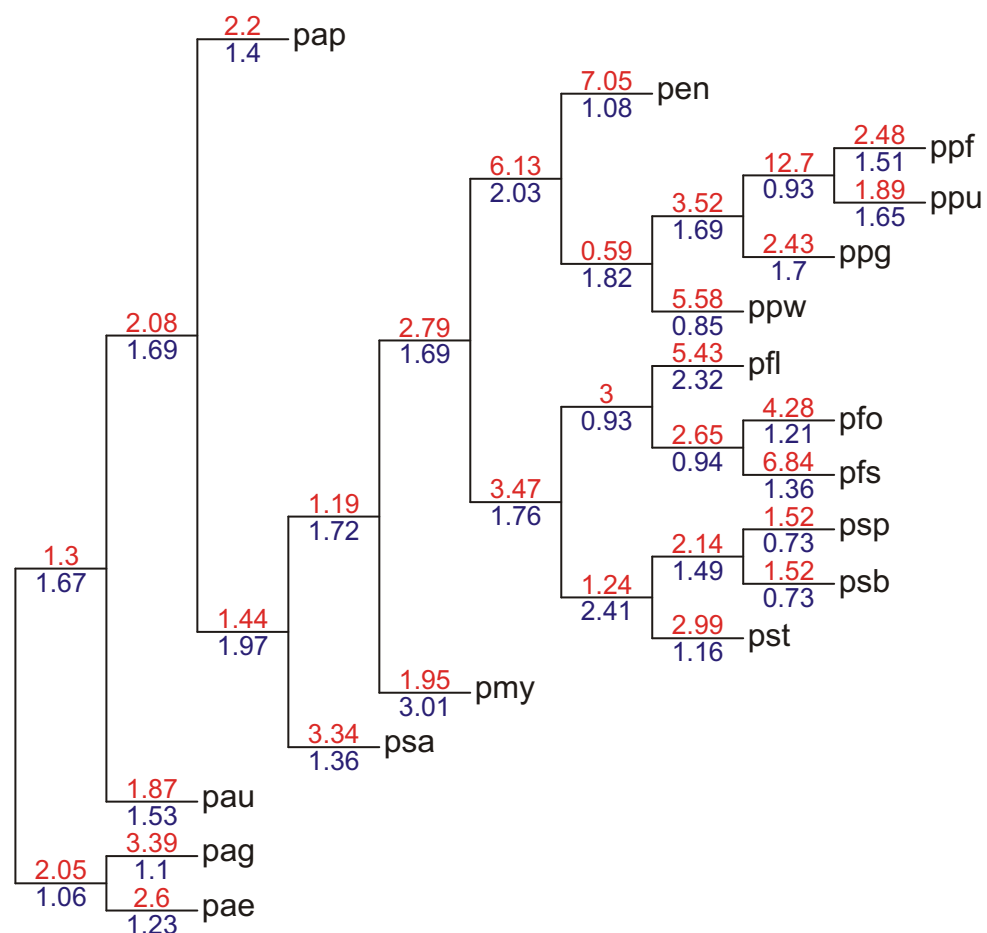

### F Pyruvate metabolism

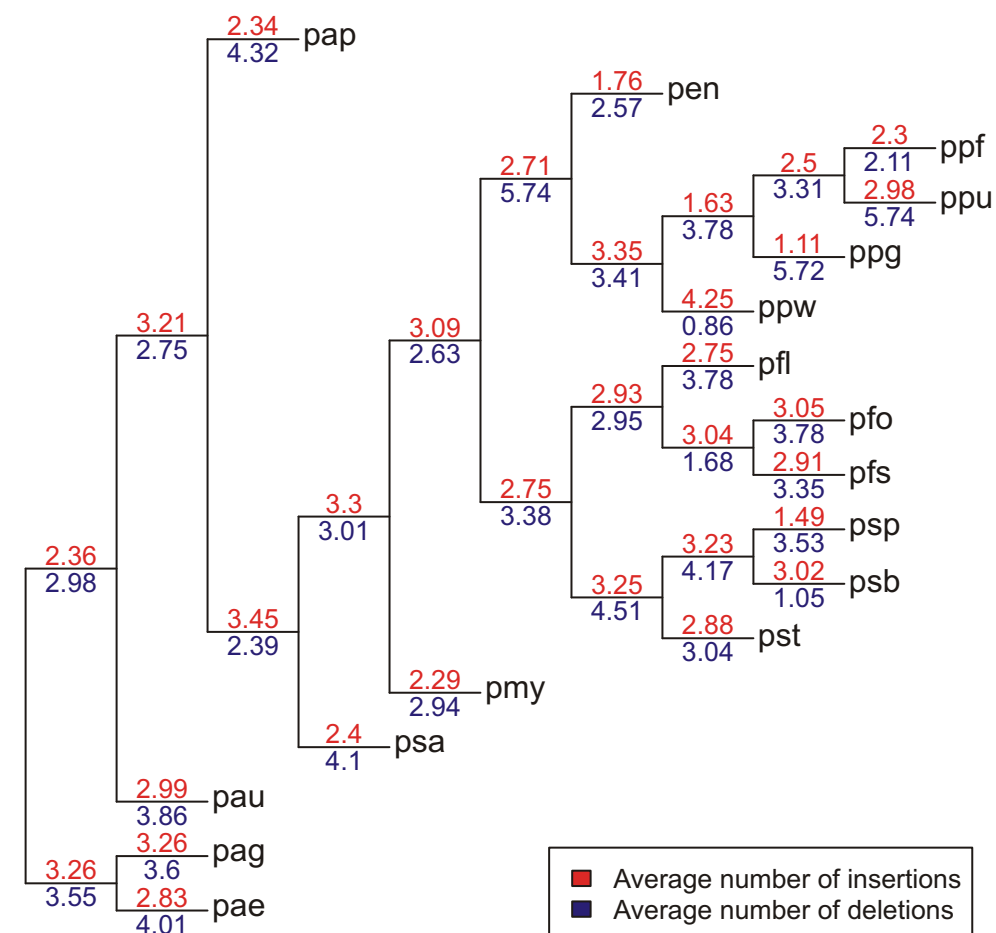

■ Average number of insertions  
■ Average number of deletions
