# Supplementary material for: A Bayesian Approach to the Evolution of Metabolic Networks on a Phylogeny
Source: PubMed Central journal article supplement (PMC2917375; doi:10.1371/journal.pcbi.1000868), 2010-08-05
Supplement: pcbi.1000868.s014.pdf [file pcbi.1000868.s014.pdf]

**Table S1**

| Parameters                                                    | $P^{\text{exact}}(H_2 H_1)$ | $P^{\text{MCMC}}(H_2 H_1)$ | Sub Network Size | $P^*(H_2 H_1)$           |
|---------------------------------------------------------------|-----------------------------|----------------------------|------------------|--------------------------|
| $\lambda t = 0.1, \mu t = 0.2$<br>(Case: $\mu = 2\lambda$ )   | $3.83215 \times 10^{-3}$    | $3.83215 \times 10^{-3}$   | 2                | $1.35067 \times 10^{-4}$ |
|                                                               |                             |                            | 4                | $9.81626 \times 10^{-4}$ |
|                                                               |                             |                            | 6                | $2.53667 \times 10^{-3}$ |
|                                                               |                             |                            | 8                | $3.78735 \times 10^{-3}$ |
| $\lambda t = 0.1, \mu t = 0.1$<br>(Case: $\mu = \lambda$ )    | $2.40262 \times 10^{-3}$    | $2.40183 \times 10^{-3}$   | 2                | $7.23895 \times 10^{-5}$ |
|                                                               |                             |                            | 4                | $5.62823 \times 10^{-4}$ |
|                                                               |                             |                            | 6                | $1.44553 \times 10^{-3}$ |
|                                                               |                             |                            | 8                | $2.66125 \times 10^{-3}$ |
| $\lambda t = 0.1, \mu t = 0.05$<br>(Case: $\mu = \lambda/2$ ) | $1.34591 \times 10^{-3}$    | $1.34526 \times 10^{-3}$   | 2                | $3.74695 \times 10^{-5}$ |
|                                                               |                             |                            | 4                | $3.01569 \times 10^{-4}$ |
|                                                               |                             |                            | 6                | $7.71806 \times 10^{-4}$ |
|                                                               |                             |                            | 8                | $1.57826 \times 10^{-3}$ |
