# Supplementary material for: A Bayesian Approach to the Evolution of Metabolic Networks on a Phylogeny
Source: PubMed Central journal article supplement (PMC2917375; doi:10.1371/journal.pcbi.1000868), 2010-08-05
Supplement: pcbi.1000868.s015.pdf [file pcbi.1000868.s015.pdf]

**Table S2**

| Pathway Map                                | Organism                                  | Reactions | Reversible | Hyperedges | Metabolites |
|--------------------------------------------|-------------------------------------------|-----------|------------|------------|-------------|
| Glycolysis / gluconeogenesis<br>(MAP00010) | Reference Network                         | 47        | 38         | 85         | 58          |
|                                            | <i>P. aeruginosa</i> LESB58               | 20        | 18         | 38         | 33          |
|                                            | <i>P. aeruginosa</i> PA14                 | 23        | 21         | 44         | 37          |
|                                            | <i>P. aeruginosa</i> PA7                  | 20        | 18         | 38         | 33          |
|                                            | <i>P. aeruginosa</i> PAO1                 | 25        | 23         | 48         | 39          |
|                                            | <i>P. entomophila</i> L48                 | 23        | 21         | 44         | 36          |
|                                            | <i>P. fluorescens</i> Pf0-1               | 26        | 24         | 50         | 38          |
|                                            | <i>P. fluorescens</i> Pf-5                | 26        | 24         | 50         | 40          |
|                                            | <i>P. fluorescens</i> SBW25               | 23        | 21         | 44         | 35          |
|                                            | <i>P. mendocina</i> ymp                   | 22        | 20         | 42         | 35          |
|                                            | <i>P. putida</i> F1                       | 24        | 22         | 46         | 38          |
|                                            | <i>P. putida</i> GB-1                     | 21        | 19         | 40         | 34          |
|                                            | <i>P. putida</i> KT2440                   | 25        | 23         | 48         | 39          |
|                                            | <i>P. putida</i> W619                     | 22        | 20         | 42         | 35          |
|                                            | <i>P. stutzeri</i> A1501                  | 25        | 23         | 48         | 38          |
|                                            | <i>P. syringae</i> pv. phaseolicola 1448A | 25        | 23         | 48         | 38          |
|                                            | <i>P. syringae</i> pv. syringae B728a     | 25        | 23         | 48         | 38          |
| <i>P. syringae</i> pv. tomato DC3000       | 25                                        | 23        | 48         | 38         |             |
| Pentose phosphate pathway<br>(MAP00030)    | Reference Network                         | 42        | 40         | 82         | 57          |
|                                            | <i>P. aeruginosa</i> LESB58               | 21        | 20         | 41         | 37          |
|                                            | <i>P. aeruginosa</i> PA14                 | 26        | 25         | 51         | 40          |
|                                            | <i>P. aeruginosa</i> PA7                  | 25        | 24         | 49         | 40          |
|                                            | <i>P. aeruginosa</i> PAO1                 | 26        | 25         | 51         | 40          |
|                                            | <i>P. entomophila</i> L48                 | 22        | 21         | 43         | 36          |
|                                            | <i>P. fluorescens</i> Pf0-1               | 27        | 26         | 53         | 42          |
|                                            | <i>P. fluorescens</i> Pf-5                | 28        | 28         | 56         | 42          |
|                                            | <i>P. fluorescens</i> SBW25               | 22        | 21         | 43         | 38          |
|                                            | <i>P. mendocina</i> ymp                   | 19        | 18         | 37         | 33          |
|                                            | <i>P. putida</i> F1                       | 27        | 26         | 53         | 42          |
|                                            | <i>P. putida</i> GB-1                     | 25        | 24         | 49         | 41          |
|                                            | <i>P. putida</i> KT2440                   | 26        | 25         | 51         | 41          |
|                                            | <i>P. putida</i> W619                     | 25        | 24         | 49         | 41          |
|                                            | <i>P. stutzeri</i> A1501                  | 20        | 19         | 39         | 31          |
|                                            | <i>P. syringae</i> pv. phaseolicola 1448A | 27        | 26         | 53         | 41          |
|                                            | <i>P. syringae</i> pv. syringae B728a     | 27        | 26         | 53         | 41          |
| <i>P. syringae</i> pv. tomato DC3000       | 27                                        | 26        | 53         | 41         |             |
| Lysine degradation<br>(MAP00310)           | Reference Network                         | 55        | 30         | 85         | 83          |
|                                            | <i>P. aeruginosa</i> LESB58               | 5         | 5          | 10         | 14          |
|                                            | <i>P. aeruginosa</i> PA14                 | 7         | 6          | 13         | 19          |
|                                            | <i>P. aeruginosa</i> PA7                  | 6         | 6          | 12         | 17          |
|                                            | <i>P. aeruginosa</i> PAO1                 | 7         | 6          | 13         | 19          |
|                                            | <i>P. entomophila</i> L48                 | 11        | 7          | 18         | 29          |
|                                            | <i>P. fluorescens</i> Pf0-1               | 8         | 6          | 14         | 23          |
|                                            | <i>P. fluorescens</i> Pf-5                | 9         | 7          | 16         | 25          |
|                                            | <i>P. fluorescens</i> SBW25               | 6         | 5          | 11         | 19          |
|                                            | <i>P. mendocina</i> ymp                   | 9         | 7          | 16         | 25          |
|                                            | <i>P. putida</i> F1                       | 8         | 7          | 15         | 21          |
|                                            | <i>P. putida</i> GB-1                     | 6         | 6          | 12         | 17          |
|                                            | <i>P. putida</i> KT2440                   | 7         | 6          | 13         | 19          |
|                                            | <i>P. putida</i> W619                     | 7         | 6          | 13         | 19          |
|                                            | <i>P. stutzeri</i> A1501                  | 7         | 6          | 13         | 19          |
|                                            | <i>P. syringae</i> pv. phaseolicola 1448A | 7         | 4          | 11         | 22          |
|                                            | <i>P. syringae</i> pv. syringae B728a     | 6         | 5          | 11         | 19          |
| <i>P. syringae</i> pv. tomato DC3000       | 7                                         | 5         | 12         | 24         |             |

(continued)

| Pathway Map                               | Organism                                  | Reactions         | Reversible | Hyperedges | Metabolites |
|-------------------------------------------|-------------------------------------------|-------------------|------------|------------|-------------|
| Histidine metabolism<br>(MAP00340)        | Reference Network                         | 49                | 17         | 66         | 70          |
|                                           | <i>P. aeruginosa</i> LESB58               | 14                | 11         | 25         | 30          |
|                                           | <i>P. aeruginosa</i> PA14                 | 16                | 12         | 28         | 33          |
|                                           | <i>P. aeruginosa</i> PA7                  | 14                | 11         | 25         | 30          |
|                                           | <i>P. aeruginosa</i> PAO1                 | 16                | 11         | 27         | 35          |
|                                           | <i>P. entomophila</i> L48                 | 18                | 12         | 30         | 38          |
|                                           | <i>P. fluorescens</i> Pf0-1               | 17                | 11         | 28         | 34          |
|                                           | <i>P. fluorescens</i> Pf-5                | 18                | 11         | 29         | 37          |
|                                           | <i>P. fluorescens</i> SBW25               | 15                | 11         | 26         | 32          |
|                                           | <i>P. mendocina</i> ymp                   | 14                | 11         | 25         | 28          |
|                                           | <i>P. putida</i> F1                       | 16                | 12         | 28         | 34          |
|                                           | <i>P. putida</i> GB-1                     | 15                | 12         | 27         | 32          |
|                                           | <i>P. putida</i> KT2440                   | 16                | 12         | 28         | 34          |
|                                           | <i>P. putida</i> W619                     | 16                | 12         | 28         | 34          |
|                                           | <i>P. stutzeri</i> A1501                  | 11                | 7          | 18         | 28          |
|                                           | <i>P. syringae</i> pv. phaseolicola 1448A | 17                | 10         | 27         | 36          |
|                                           | <i>P. syringae</i> pv. syringae B728a     | 15                | 11         | 26         | 32          |
|                                           | <i>P. syringae</i> pv. tomato DC3000      | 15                | 11         | 26         | 32          |
|                                           | Phenylalanine metabolism<br>(MAP00360)    | Reference Network | 59         | 21         | 80          |
| <i>P. aeruginosa</i> LESB58               |                                           | 8                 | 5          | 13         | 26          |
| <i>P. aeruginosa</i> PA14                 |                                           | 8                 | 5          | 13         | 26          |
| <i>P. aeruginosa</i> PA7                  |                                           | 9                 | 6          | 15         | 27          |
| <i>P. aeruginosa</i> PAO1                 |                                           | 8                 | 5          | 13         | 26          |
| <i>P. entomophila</i> L48                 |                                           | 12                | 6          | 18         | 33          |
| <i>P. fluorescens</i> Pf0-1               |                                           | 8                 | 4          | 12         | 28          |
| <i>P. fluorescens</i> Pf-5                |                                           | 10                | 5          | 15         | 31          |
| <i>P. fluorescens</i> SBW25               |                                           | 12                | 6          | 18         | 36          |
| <i>P. mendocina</i> ymp                   |                                           | 5                 | 3          | 8          | 17          |
| <i>P. putida</i> F1                       |                                           | 13                | 6          | 19         | 39          |
| <i>P. putida</i> GB-1                     |                                           | 11                | 6          | 17         | 32          |
| <i>P. putida</i> KT2440                   |                                           | 11                | 5          | 16         | 31          |
| <i>P. putida</i> W619                     |                                           | 19                | 7          | 26         | 46          |
| <i>P. stutzeri</i> A1501                  |                                           | 6                 | 4          | 10         | 19          |
| <i>P. syringae</i> pv. phaseolicola 1448A |                                           | 9                 | 5          | 14         | 29          |
| <i>P. syringae</i> pv. syringae B728a     |                                           | 9                 | 5          | 14         | 26          |
| <i>P. syringae</i> pv. tomato DC3000      |                                           | 8                 | 4          | 12         | 28          |
| Pyruvate metabolism<br>(MAP00620)         |                                           | Reference Network | 71         | 50         | 121         |
|                                           | <i>P. aeruginosa</i> LESB58               | 27                | 22         | 49         | 43          |
|                                           | <i>P. aeruginosa</i> PA14                 | 29                | 24         | 53         | 44          |
|                                           | <i>P. aeruginosa</i> PA7                  | 28                | 23         | 51         | 43          |
|                                           | <i>P. aeruginosa</i> PAO1                 | 29                | 24         | 53         | 44          |
|                                           | <i>P. entomophila</i> L48                 | 27                | 22         | 49         | 43          |
|                                           | <i>P. fluorescens</i> Pf0-1               | 26                | 21         | 47         | 40          |
|                                           | <i>P. fluorescens</i> Pf-5                | 27                | 20         | 47         | 43          |
|                                           | <i>P. fluorescens</i> SBW25               | 24                | 21         | 45         | 43          |
|                                           | <i>P. mendocina</i> ymp                   | 28                | 22         | 50         | 46          |
|                                           | <i>P. putida</i> F1                       | 29                | 23         | 52         | 45          |
|                                           | <i>P. putida</i> GB-1                     | 25                | 21         | 46         | 43          |
|                                           | <i>P. putida</i> KT2440                   | 24                | 20         | 44         | 41          |
|                                           | <i>P. putida</i> W619                     | 27                | 23         | 50         | 44          |
|                                           | <i>P. stutzeri</i> A1501                  | 28                | 23         | 51         | 45          |
|                                           | <i>P. syringae</i> pv. phaseolicola 1448A | 27                | 22         | 49         | 43          |
|                                           | <i>P. syringae</i> pv. syringae B728a     | 27                | 23         | 50         | 45          |
|                                           | <i>P. syringae</i> pv. tomato DC3000      | 26                | 22         | 48         | 40          |
