# Supplementary material for: A Bayesian Approach to the Evolution of Metabolic Networks on a Phylogeny
Source: PubMed Central journal article supplement (PMC2917375; doi:10.1371/journal.pcbi.1000868), 2010-08-05
Supplement: pcbi.1000868.s016.pdf [file pcbi.1000868.s016.pdf]

**Table S3**

| <b>Pathway Map</b>                         | <b>Phylogeny</b>                                                    | <b>ESS<sub>δ</sub></b> | <b>ESS<sub>λ</sub></b> | <b>ESS<sub>μ</sub></b> |
|--------------------------------------------|---------------------------------------------------------------------|------------------------|------------------------|------------------------|
| Glycolysis / Gluconeogenesis<br>(MAP00010) | ((pfs,pfo),pfl)<br>(pst,(psb,psp))<br>17 <i>Pseudomonas</i> strains | 2310<br>2310<br>1626   | 2310<br>2310<br>1565   | 2310<br>2310<br>3099   |
| Pentose phosphate pathway<br>(MAP00030)    | ((pfs,pfo),pfl)<br>(pst,(psb,psp))<br>17 <i>Pseudomonas</i> strains | 757<br>2310<br>2310    | 539<br>2310<br>2310    | 401<br>1948<br>1948    |
| Lysine degradation<br>(MAP00310)           | ((pfs,pfo),pfl)<br>(pst,(psb,psp))<br>17 <i>Pseudomonas</i> strains | 2310<br>2310<br>1626   | 2310<br>2310<br>1565   | 2310<br>2310<br>3099   |
| Histidine metabolism<br>(MAP00340)         | ((pfs,pfo),pfl)<br>(pst,(psb,psp))<br>17 <i>Pseudomonas</i> strains | 2310<br>2310<br>2310   | 2310<br>2310<br>2310   | 2310<br>2310<br>3897   |
| Phenylalanine metabolism<br>(MAP00360)     | ((pfs,pfo),pfl)<br>(pst,(psb,psp))<br>17 <i>Pseudomonas</i> strains | 2310<br>2310<br>3128   | 3897<br>1948<br>3128   | 2310<br>2310<br>3099   |
| Pyruvate metabolism<br>(MAP00620)          | ((pfs,pfo),pfl)<br>(pst,(psb,psp))<br>17 <i>Pseudomonas</i> strains | 1224<br>2310<br>1626   | 825<br>2310<br>1565    | 956<br>3173<br>3099    |
