# Supplementary material for: A Bayesian Approach to the Evolution of Metabolic Networks on a Phylogeny
Source: PubMed Central journal article supplement (PMC2917375; doi:10.1371/journal.pcbi.1000868), 2010-08-05
Supplement: pcbi.1000868.s017.pdf [file pcbi.1000868.s017.pdf]

**Table S4**

| <b>Pathway Map</b>                         | <b>Phylogeny</b>              | <b>Running Time (hr)</b> | <b>Acceptance Percentage</b> |
|--------------------------------------------|-------------------------------|--------------------------|------------------------------|
| Glycolysis / Gluconeogenesis<br>(MAP00010) | ((pfs,pfo),pfl)               | $6.33 \pm 0.55$          | $14.11 \pm 0.04$             |
|                                            | (pst,(psb,psp))               | $4.96 \pm 0.18$          | $33.28 \pm 1.25$             |
|                                            | 17 <i>Pseudomonas</i> strains | $44.41 \pm 8.16$         | $1.02 \pm 0.06$              |
| Pentose phosphate pathway<br>(MAP00030)    | ((pfs,pfo),pfl)               | $12.37 \pm 0.69$         | $5.36 \pm 0.04$              |
|                                            | (pst,(psb,psp))               | $10.16 \pm 0.31$         | $19.74 \pm 0.34$             |
|                                            | 17 <i>Pseudomonas</i> strains | $90.02 \pm 8.25$         | $1.01 \pm 0.04$              |
| Lysine degradation<br>(MAP00310)           | ((pfs,pfo),pfl)               | $6.45 \pm 0.99$          | $27.26 \pm 0.21$             |
|                                            | (pst,(psb,psp))               | $6.19 \pm 0.88$          | $23.65 \pm 0.21$             |
|                                            | 17 <i>Pseudomonas</i> strains | $38.47 \pm 7.87$         | $2.10 \pm 0.72$              |
| Histidine metabolism<br>(MAP00340)         | ((pfs,pfo),pfl)               | $5.52 \pm 0.52$          | $22.23 \pm 0.31$             |
|                                            | (pst,(psb,psp))               | $5.65 \pm 0.36$          | $22.91 \pm 0.30$             |
|                                            | 17 <i>Pseudomonas</i> strains | $29.54 \pm 7.21$         | $1.08 \pm 0.09$              |
| Phenylalanine metabolism<br>(MAP00360)     | ((pfs,pfo),pfl)               | $9.39 \pm 0.84$          | $15.47 \pm 0.21$             |
|                                            | (pst,(psb,psp))               | $9.20 \pm 0.85$          | $14.16 \pm 0.09$             |
|                                            | 17 <i>Pseudomonas</i> strains | $52.49 \pm 5.04$         | $1.59 \pm 0.07$              |
| Pyruvate metabolism<br>(MAP00620)          | ((pfs,pfo),pfl)               | $23.76 \pm 1.92$         | $8.66 \pm 0.06$              |
|                                            | (pst,(psb,psp))               | $24.20 \pm 2.05$         | $15.13 \pm 0.24$             |
|                                            | 17 <i>Pseudomonas</i> strains | $98.01 \pm 9.10$         | $1.29 \pm 0.03$              |
